# Supplementary material
Source: Springer Nature journal article supplement (https://www.springermedizin.de/resource/supplementary/12911_2011_453_MOESM2_ESM.pdf/9525782)

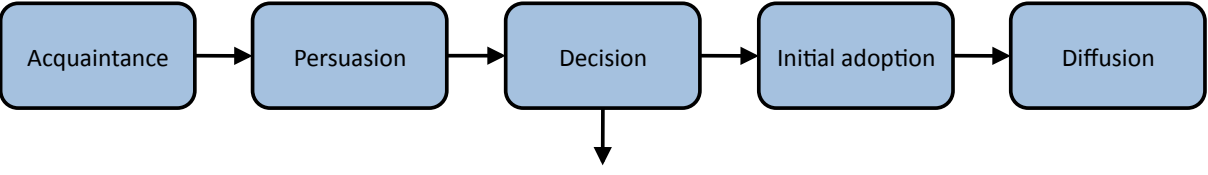

Acquaintance

Persuasion

Decision

Initial adoption

Diffusion

Supplement: MOESM2 [file 9525782]
